# Supplementary material for: Partition of proteins with extraction in aqueous two-phase system by hydroxyl ammonium-based ionic liquid
Source: Royal Society of Chemistry journal article supplement (doi:10.1039/c4ay00233d), 2014-01-01
Supplement: c4ay00233d1.pdf [file c4ay00233d1.pdf]

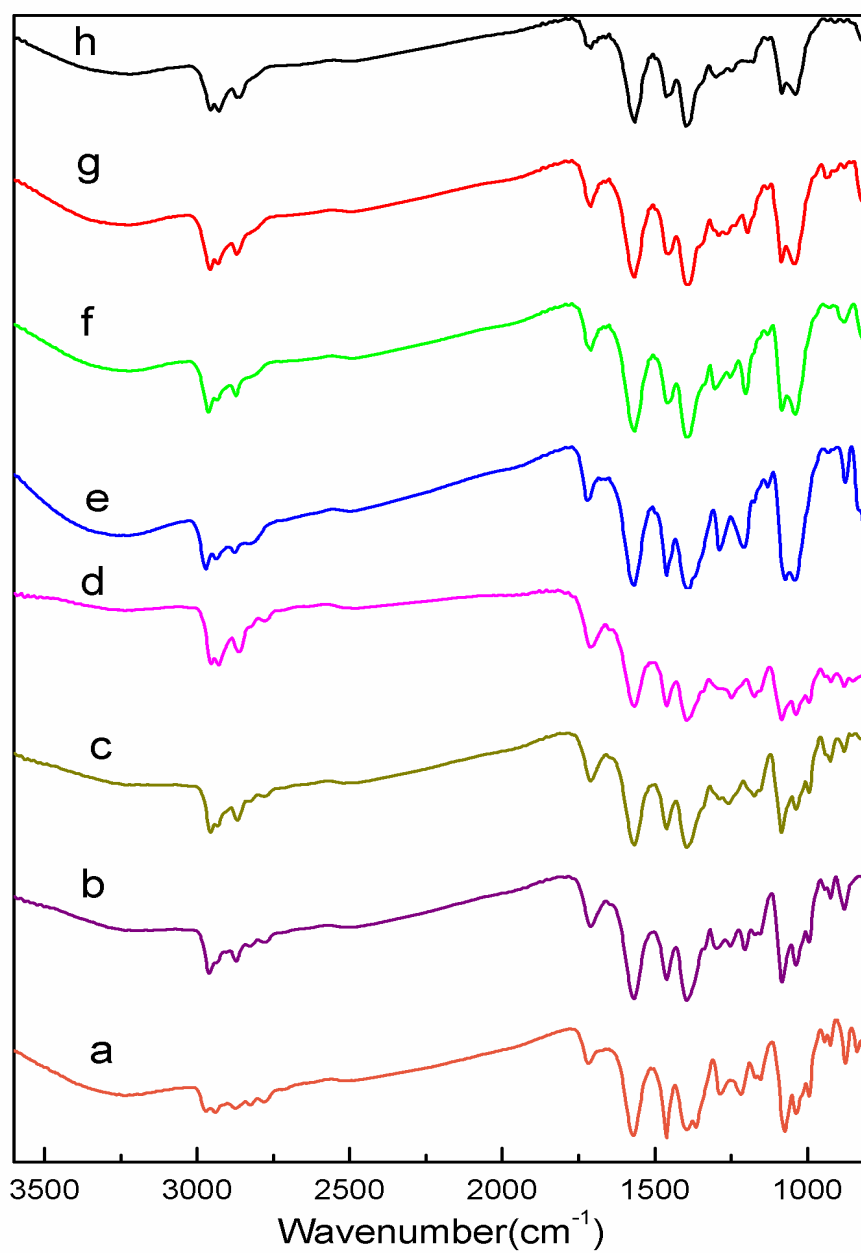

Fig. S1 Infrared spectroscopy of ILs: a. [DMEA][Pr], b. [DMEA][Bu], c. [DMEA][Pent], d. [DMEA][Hex], e. [DEEA][Pr], f. [DEEA][Bu], g. [DEEA][Pent], h. [DEEA][Hex].
