# Supplementary material for: Partition of proteins with extraction in aqueous two-phase system by hydroxyl ammonium-based ionic liquid
Source: Royal Society of Chemistry journal article supplement (doi:10.1039/c4ay00233d), 2014-01-01
Supplement: c4ay00233d2.pdf [file c4ay00233d2.pdf]

**Table S1**

**(A) <sup>1</sup>H-NMR spectra of the investigated ILs**

| NMR ( $\delta$ , $\times 10^{-6}$ ) <sup>a</sup> |            |            |             |             |             |             |             |
|--------------------------------------------------|------------|------------|-------------|-------------|-------------|-------------|-------------|
| 2-H                                              | 3-H        | 4-H        | 5-H         | 6-H         | 7-H         | 8-H         | 9-H         |
| 6.04(s,1H)                                       | 3.50(t,2H) | 2.42(t,2H) | 2.17(q, 2H) | 0.98(t, 3H) | -           | -           | -           |
| 5.96(s,1H)                                       | 3.49(t,2H) | 2.41(t,2H) | 2.14(t, 2H) | 1.50(q, 2H) | 0.97(t, 3H) | -           | -           |
| 5.87(s,1H)                                       | 3.48(t,2H) | 2.40(t,2H) | 2.15(t, 2H) | 1.46(m, 2H) | 1.28(m, 2H) | 0.86(t, 3H) | -           |
| 5.85(s,1H)                                       | 3.46(t,2H) | 2.39(t,2H) | 2.12(t, 2H) | 1.45(m, 2H) | 1.26(m, 2H) | 0.87(m, 3H) | 0.77(t, 3H) |
| 6.88(s,1H)                                       | 3.47(t,2H) | 2.56(m,2H) | 2.16(q, 2H) | 0.98(m, 3H) | -           | -           | -           |
| 6.65(s,1H)                                       | 3.46(t,2H) | 2.55(m,2H) | 2.13(t, 2H) | 1.50(m, 2H) | 0.87(t, 3H) | -           | -           |
| 5.94(s,1H)                                       | 3.46(t,2H) | 2.55(m,2H) | 2.13(t, 2H) | 1.47(m, 2H) | 1.28(m, 2H) | 0.87(t, 3H) | -           |
| 5.68(s,1H)                                       | 3.46(t,2H) | 2.54(m,2H) | 2.15(t, 2H) | 1.49(m, 2H) | 1.26(m, 2H) | 1.26(m, 2H) | 0.86(t, 3H) |

<sup>a</sup> Note: <sup>1</sup>H-NMR chemical shifts are reported downfield from trimethylsilane (TMS). Multiplicities are abbreviated as s=singlet, d=doublet,

quart =quartet, t=triplet and m= multiplet.

<sup>b</sup>The eight ILs were recorded on Varian-INOVA 400 NMR spectrometry.
