# Supplementary material for: Partition of proteins with extraction in aqueous two-phase system by hydroxyl ammonium-based ionic liquid
Source: Royal Society of Chemistry journal article supplement (doi:10.1039/c4ay00233d), 2014-01-01
Supplement: c4ay00233d3.pdf [file c4ay00233d3.pdf]

**Table S2. Five single factor experiments**

**(A) Investigated factor 1: the mass of IL**

| IL<br>(g) | Ct<br>(mg/ml) | Cb<br>(mg/ml) | K    | Vt<br>(ml) | Vb<br>(ml) | R    | E%    |
|-----------|---------------|---------------|------|------------|------------|------|-------|
| 0.9       | 13.05         | 5.05          | 2.58 | 1.95       | 0.90       | 2.17 | 84.84 |
| 1         | 12.61         | 1.80          | 7.00 | 2.25       | 0.90       | 2.50 | 94.59 |
| 1.2       | 11.63         | 2.08          | 5.60 | 2.40       | 1.00       | 2.40 | 93.07 |
| 1.4       | 10.75         | 2.04          | 5.27 | 2.60       | 1.00       | 2.60 | 93.20 |
| 1.6       | 10.46         | 2.28          | 4.58 | 2.65       | 1.00       | 2.65 | 92.39 |
| 1.8       | 9.68          | 2.04          | 4.75 | 2.90       | 0.95       | 3.05 | 93.54 |
| 2         | 9.53          | 1.99          | 4.80 | 2.95       | 0.95       | 3.11 | 93.71 |

Note: 1. k was represented the partition coefficient, R was represented the phase volume ratio, E% was represented the extraction efficiency, which was calculated from equation (1), (2), (3), respectively.

**(B) Investigated factor 2: the mass of K<sub>2</sub>HPO<sub>4</sub>**

| K <sub>2</sub> HPO <sub>4</sub><br>(g) | Ct<br>(mg/ml) | Cb<br>(mg/ml) | K      | Vt<br>(ml) | Vb<br>(ml) | R    | E%    |
|----------------------------------------|---------------|---------------|--------|------------|------------|------|-------|
| 1.4                                    | 11.63         | 2.31          | 5.04   | 2.40       | 0.90       | 2.67 | 93.07 |
| 1.5                                    | 12.56         | 1.39          | 9.07   | 2.25       | 1.25       | 1.80 | 94.23 |
| 1.6                                    | 13.59         | 1.04          | 13.04  | 2.10       | 1.40       | 1.50 | 95.14 |
| 1.7                                    | 15.30         | 0.62          | 24.84  | 1.90       | 1.50       | 1.27 | 96.92 |
| 1.8                                    | 15.84         | 0.42          | 37.68  | 1.85       | 1.65       | 1.12 | 97.69 |
| 1.9                                    | 16.92         | 0.23          | 75.08  | 1.75       | 1.75       | 1.00 | 98.69 |
| 2                                      | 17.99         | 0.17          | 107.32 | 1.65       | 1.85       | 0.89 | 98.97 |
| 2.2                                    | 18.24         | 0.82          | 22.13  | 1.55       | 2.10       | 0.74 | 94.23 |
| 2.4                                    | 17.80         | 1.50          | 11.86  | 1.50       | 2.20       | 0.68 | 88.99 |
| 2.6                                    | 17.46         | 2.04          | 8.56   | 1.45       | 2.30       | 0.63 | 84.37 |
| 2.8                                    | 15.79         | 3.29          | 4.80   | 1.40       | 2.40       | 0.58 | 73.70 |
| 3                                      | 15.60         | 3.58          | 4.36   | 1.35       | 2.50       | 0.54 | 70.19 |

Note: 1. k was represented the partition coefficient, R was represented the phase volume ratio, E% was represented the extraction efficiency, which was calculated from equation (1), (2), (3), respectively.

**(C) Investigated factor 3: the concentration of BSA**

| BSA<br>(mg/ml) | Ct<br>(mg/ml) | Cb<br>(mg/ml) | K      | Vt<br>(ml) | Vb<br>(ml) | R    | E%    |
|----------------|---------------|---------------|--------|------------|------------|------|-------|
| 5              | 2.89          | 0.12          | 23.62  | 1.65       | 1.85       | 0.89 | 95.47 |
| 10             | 6.03          | 0.03          | 225.04 | 1.65       | 1.85       | 0.89 | 99.50 |
| 15             | 9.02          | 0.06          | 145.48 | 1.65       | 1.85       | 0.89 | 99.24 |
| 20             | 12.00         | 0.11          | 107.32 | 1.65       | 1.85       | 0.89 | 98.97 |
| 25             | 14.95         | 0.18          | 84.93  | 1.65       | 1.85       | 0.89 | 98.70 |
| 30             | 17.897        | 0.26          | 70.20  | 1.65       | 1.85       | 0.89 | 98.43 |
| 35             | 20.71         | 0.45          | 46.00  | 1.65       | 1.85       | 0.89 | 97.62 |

Note: 1. k was represented the partition coefficient, R was represented the phase volume ratio, E% was represented the extraction efficiency, which was calculated from equation (1), (2), (3), respectively.

**(D) Investigated factor4: the separation time**

| <b>t</b><br>(min) | <b>Ct</b><br>(mg/ml) | <b>Cb</b><br>(mg/ml) | <b>K</b> | <b>Vt</b><br>(ml) | <b>Vb</b><br>(ml) | <b>R</b> | <b>E%</b> |
|-------------------|----------------------|----------------------|----------|-------------------|-------------------|----------|-----------|
| 2                 | 4.14                 | 1.71                 | 2.42     | 1.65              | 1.85              | 0.89     | 68.29     |
| 4                 | 5.00                 | 0.94                 | 5.31     | 1.65              | 1.85              | 0.89     | 82.55     |
| 8                 | 5.72                 | 0.30                 | 18.87    | 1.65              | 1.85              | 0.89     | 94.39     |
| 10                | 5.77                 | 0.26                 | 22.23    | 1.65              | 1.85              | 0.89     | 95.20     |
| 15                | 5.90                 | 0.14                 | 41.22    | 1.65              | 1.85              | 0.89     | 97.35     |
| 20                | 6.01                 | 0.04                 | 145.48   | 1.65              | 1.85              | 0.89     | 99.24     |
| 25                | 6.01                 | 0.04                 | 145.48   | 1.65              | 1.85              | 0.89     | 99.24     |
| 30                | 6.03                 | 0.03                 | 225.04   | 1.65              | 1.85              | 0.89     | 99.50     |

Note: 1. k was represented the partition coefficient, R was represented the phase volume ratio, E% was represented the extraction efficiency, which was calculated from equation (1), (2), (3), respectively.

**(E) Investigated factor 5: the temperature**

| <b>T</b><br>(°C) | <b>Ct</b><br>(mg/ml) | <b>Cb</b><br>(mg/ml) | <b>K</b> | <b>Vt</b><br>(ml) | <b>Vb</b><br>(ml) | <b>R</b> | <b>E%</b> |
|------------------|----------------------|----------------------|----------|-------------------|-------------------|----------|-----------|
| 15               | 5.25                 | 0.73                 | 7.24     | 1.65              | 1.85              | 0.89     | 86.59     |
| 20               | 5.67                 | 0.35                 | 16.36    | 1.65              | 1.85              | 0.89     | 93.59     |
| 25               | 6.01                 | 0.04                 | 145.48   | 1.65              | 1.85              | 0.89     | 99.24     |
| 30               | 6.00                 | 0.06                 | 107.32   | 1.65              | 1.85              | 0.89     | 98.97     |
| 35               | 5.82                 | 0.22                 | 26.95    | 1.65              | 1.85              | 0.89     | 96.07     |
| 40               | 5.66                 | 0.36                 | 15.65    | 1.65              | 1.85              | 0.89     | 93.32     |
| 50               | 5.30                 | 0.68                 | 7.77     | 1.65              | 1.85              | 0.89     | 87.40     |

Note: 1. k was represented the partition coefficient, R was represented the phase volume ratio, E% was represented the extraction efficiency, which was calculated from equation (1), (2), (3), respectively.
