# Supplementary material for: Partition of proteins with extraction in aqueous two-phase system by hydroxyl ammonium-based ionic liquid
Source: Royal Society of Chemistry journal article supplement (doi:10.1039/c4ay00233d), 2014-01-01
Supplement: c4ay00233d4.pdf [file c4ay00233d4.pdf]

**Table S3. The results of precision experiment, repeatability experiment and stability experiment.**

| Precision measurement results (n=5)     |       |       |       |       |       |
|-----------------------------------------|-------|-------|-------|-------|-------|
| Times number                            | 1     | 2     | 3     | 4     | 5     |
| Absorbance                              | 0.366 | 0.363 | 0.367 | 0.365 | 0.367 |
| Extraction efficiency (%)               | 99.24 | 99.43 | 99.50 | 99.97 | 99.50 |
| RSD (%)                                 | 0.3   |       |       |       |       |
| Repeatability measurement results (n=5) |       |       |       |       |       |
| Sample number                           | 1     | 2     | 3     | 4     | 5     |
| Absorbance                              | 0.366 | 0.361 | 0.359 | 0.367 | 0.358 |
| Extraction efficiency (%)               | 99.24 | 97.89 | 97.35 | 99.50 | 97.08 |
| RSD (%)                                 | 1.1   |       |       |       |       |
| Stability measurement results (n=5)     |       |       |       |       |       |
| Day number                              | 1     | 2     | 3     | 4     | 5     |
| Absorbance                              | 0.366 | 0.363 | 0.367 | 0.354 | 0.358 |
| Extraction efficiency (%)               | 99.24 | 98.43 | 99.50 | 96.01 | 97.08 |
| RSD (%)                                 | 1.5   |       |       |       |       |
